# Supplementary material for: A novel screening method for free non-standard amino acids in human plasma samples using AccQ·Tag reagents and LC-MS/MS
Source: Royal Society of Chemistry journal article supplement (doi:10.1039/d2ay01588a), 2023-01-01
Supplement: d2ay01588a3.pdf [file d2ay01588a3.pdf]

A)

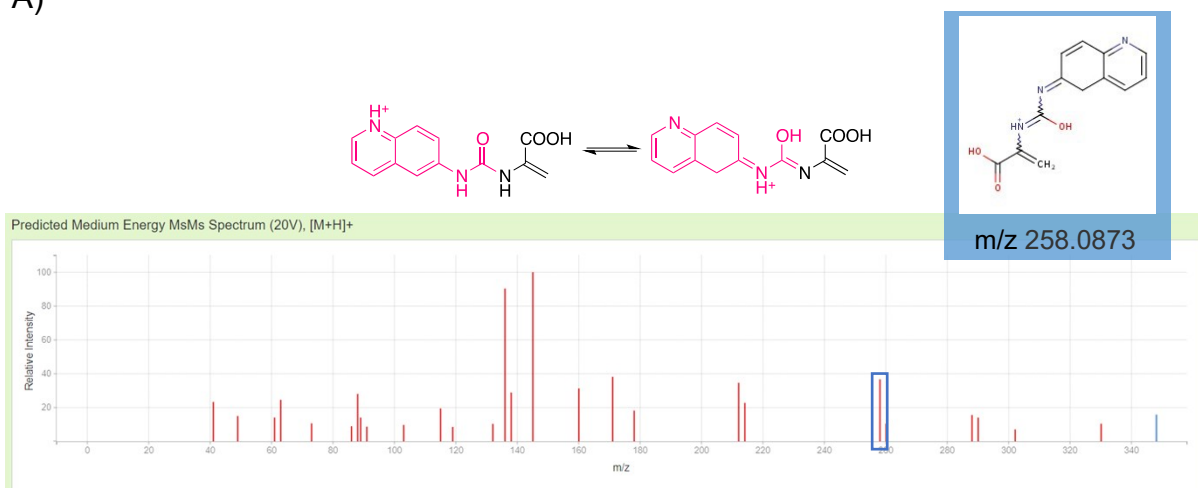

B)

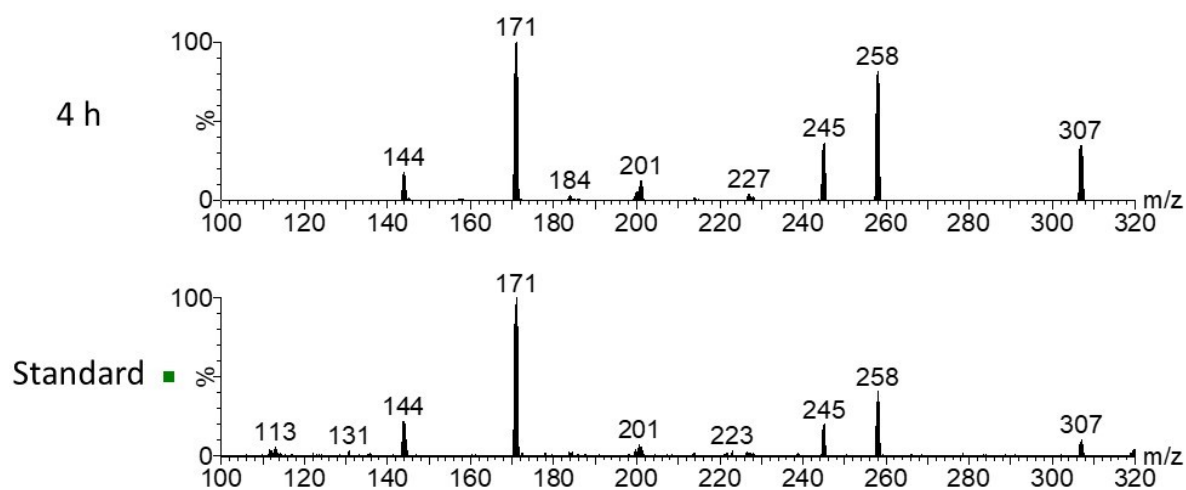

**Fig. S2** A) CFM-ID *in silico* prediction of fragment spectra for **3**. Blue box indicates predicted m/z 258 fragment ion. Possible re-arrangement of the m/z 258 ion in the gas-phase are shown. B) MS/MS fragment spectra of putative identification of **3** at 4 h after garlic supplement administration and blank plasma spiked with SACS analytical standard.
