# Supplementary material for: A novel screening method for free non-standard amino acids in human plasma samples using AccQ·Tag reagents and LC-MS/MS
Source: Royal Society of Chemistry journal article supplement (doi:10.1039/d2ay01588a), 2023-01-01
Supplement: d2ay01588a4.pdf [file d2ay01588a4.pdf]

A)

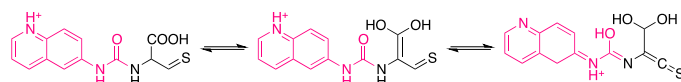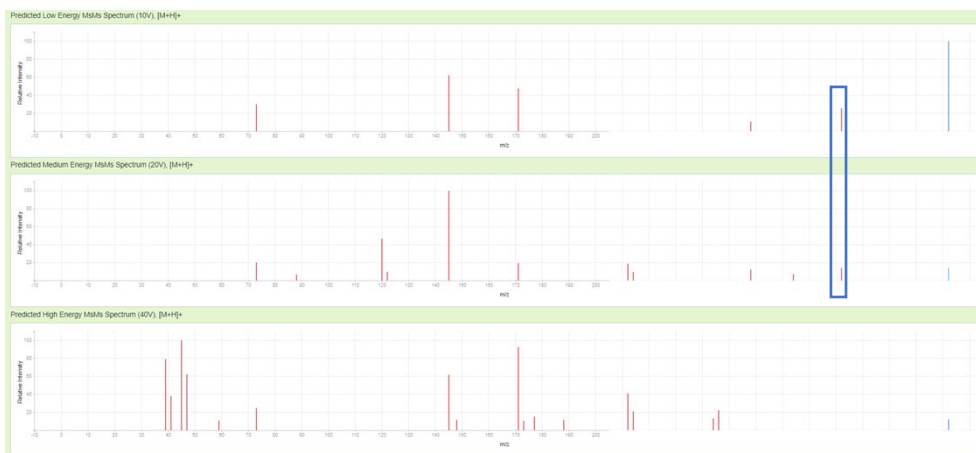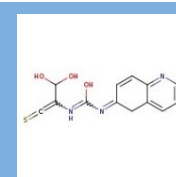

m/z 290.0594

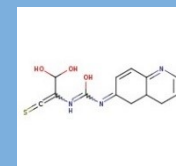

m/z 292.0750

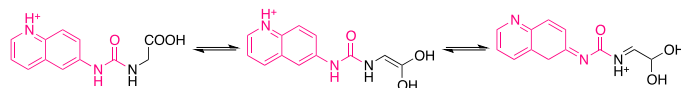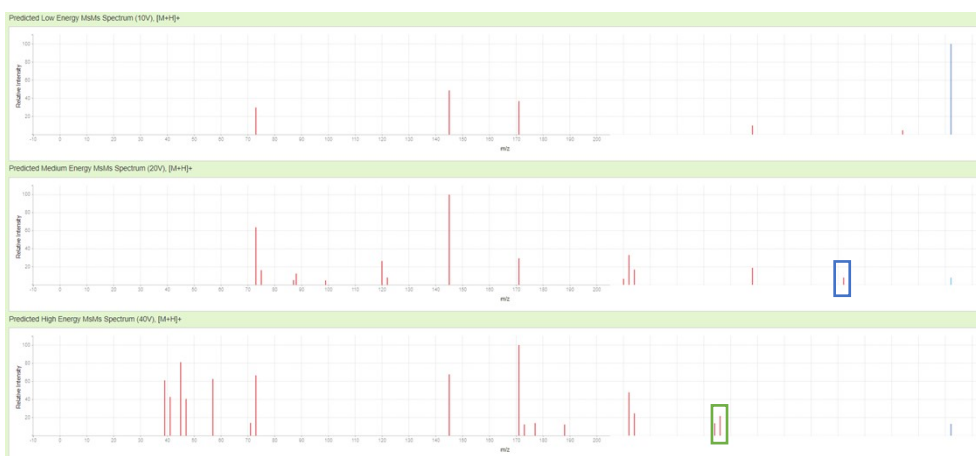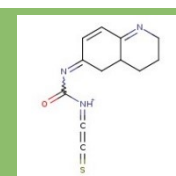

m/z 246.0696

B)

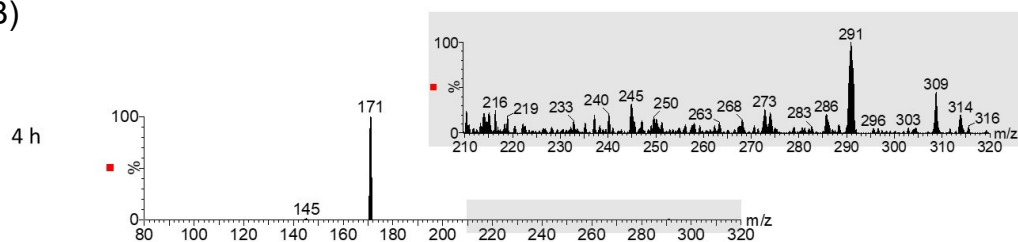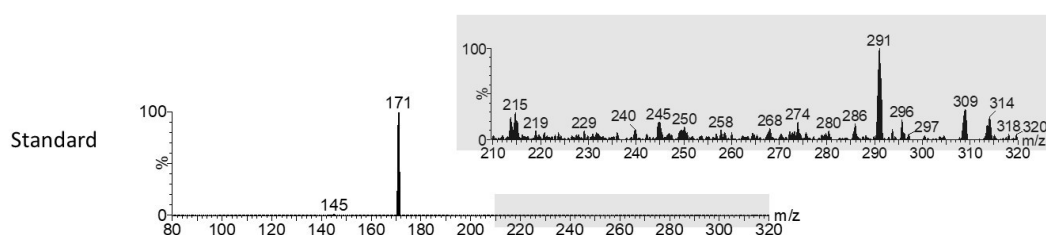

**Fig. S3** A) CFM-ID *in silico* prediction of fragment spectra for **1** and **8**. Blue box indicates predicted m/z 292 and the related m/z 290 fragment ion. Green box indicates predicted m/z 246 ion. Possible re-arrangement of the m/z 246 and m/z 290 ion in the gas-phase are shown. B) MS/MS fragment spectra of chromatographic feature at 7.47-7.50 min after 4 h of garlic administration and blank plasma spiked with S1PC analytical standard.
