# Supplementary figures and images for: A novel screening method for free non-standard amino acids in human plasma samples using AccQ·Tag reagents and LC-MS/MS
Source: Royal Society of Chemistry journal article supplement (doi:10.1039/d2ay01588a), 2023-01-01

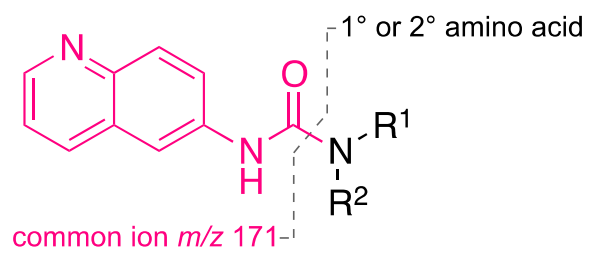

**Fig. S1** Fragmentation of 1° and 2° amino acids to produce a common ion ( $m/z$  171).

Supplement: d2ay01588a2.pdf [file d2ay01588a2.pdf]

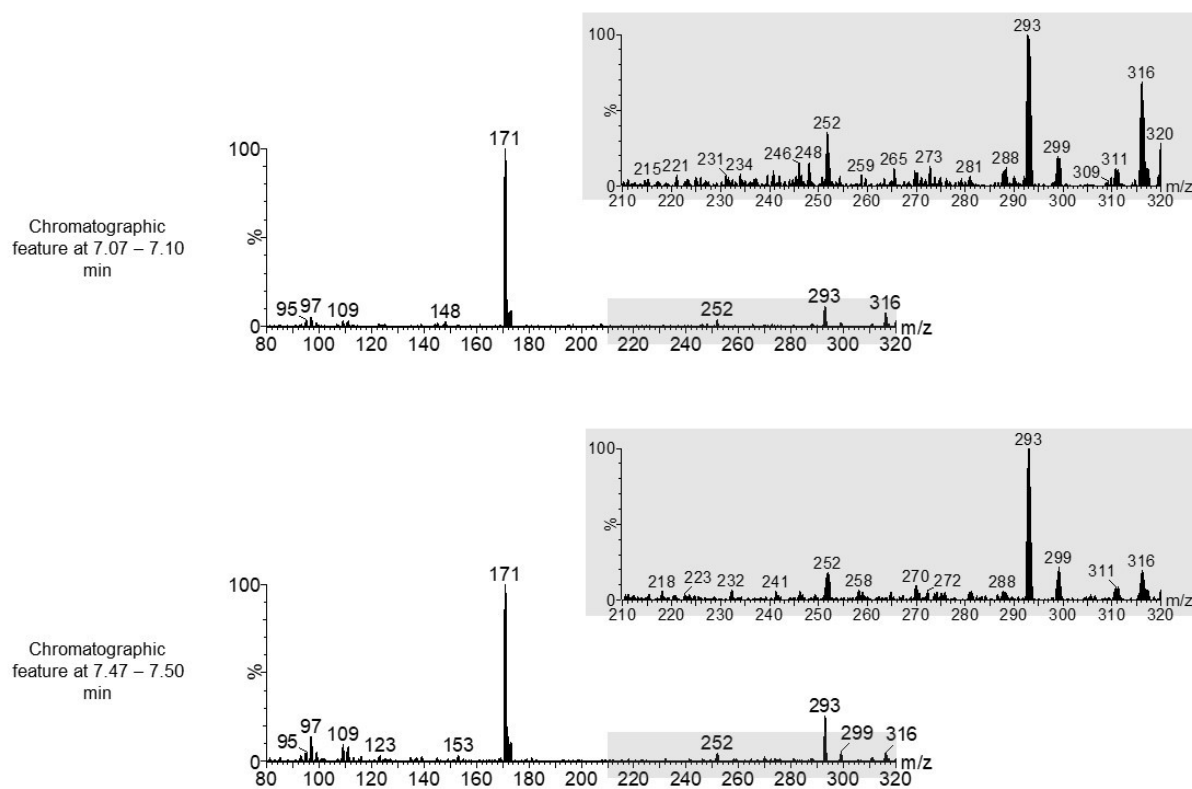

**Fig. S4** MS/MS fragment spectra of putative identification of **9**.

Supplement: d2ay01588a5.pdf [file d2ay01588a5.pdf]
